# Supplementary material
Source: PubMed Central journal article supplement (PMC5352458)
Supplement: NIHMS854836-supplement-Supp1.pdf [file NIHMS854836-supplement-Supp1.pdf]

## Supporting Information

**Table S1.** Primer sequences used in Real-time RT-PCR

| <i>Gene</i>        | <i>Forward primer (5'-3')</i> | <i>Reverse Primer (5'-3')</i> | <i>GeneBank no.</i> | <i>Product size (bp)</i> |
|--------------------|-------------------------------|-------------------------------|---------------------|--------------------------|
| <i>RUNX2</i>       | CGAATGCACTATCCAGCCAC          | TCCACTCTGGCTTTGGGAAG          | NM_001015051        | 135                      |
| <i>Osterix/SP7</i> | TTCACTATGCTCCAGTCCC           | GAGTACGGCTTCTTTGTGCC          | NM_00117346         | 118                      |
| <i>COL1A1</i>      | TGCTGGTGCTCCTGGTACTC          | TCCAGAGGGACCTTGTTTGC          | NM_000088           | 142                      |
| <i>ALP</i>         | ACCGAGATAACAAGCACTCCC         | TCACGTTGTTCTGTTTCAGC          | NM_000478           | 134                      |
| <i>IBSP</i>        | GGGAGTACGAATACACGGGC          | TAGCCATCGTAGCCTTGTC           | NM_00496            | 148                      |
| <i>OCN</i>         | GCGCTACCTGTATCAATGGC          | TCCTGAAAGCCGATGTGGTC          | NM_19917            | 123                      |
| <i>β2MG</i>        | TGTGCTCGCGCTACTCTCTC          | CGGATGGATGAAACCCAGAC          | NM_004048           | 137                      |

\*All primer sequences were designed based on gene sequence obtained from the respective GenBank numbers using Primer-BLAST (<http://www.ncbi.nlm.nih.gov/tools/primer-blast/>).
